## **Rapid conversion of replicating and integrating *Saccharomyces cerevisiae* plasmid vectors via Cre recombinase**

Daniel P. Nickerson<sup>1\*</sup>, Monique A. Quinn<sup>1</sup>, and Joshua M. Milnes<sup>2,3</sup>

<sup>1</sup>Department of Biology, California State University, San Bernardino, CA 92407

<sup>2</sup>Department of Biochemistry, University of Washington School of Medicine, Seattle, WA 98195-3750

<sup>3</sup>Present address: Washington State Department of Agriculture – Plant Protection Division, Yakima, WA 98902

\*Corresponding author: [daniel.nickerson@csusb.edu](mailto:daniel.nickerson@csusb.edu)

Key words: Cre recombinase, homologous recombination, plasmid, shuttle vector, overexpression, molecular cloning, genetic engineering, yeast

Running title: Remodeling yeast vector replication loci

1 **ABSTRACT**

2 Plasmid shuttle vectors capable of replication in both *Saccharomyces cerevisiae* and *Escherichia*  
3 *coli* and optimized for controlled modification *in vitro* and *in vivo* are a key resource supporting  
4 yeast as a premier system for genetics research and synthetic biology. We have engineered a  
5 series of yeast shuttle vectors optimized for efficient insertion, removal and substitution of  
6 plasmid yeast replication loci, allowing generation of a complete set of integrating, low copy  
7 and high copy plasmids via predictable operations as an alternative to traditional subcloning.  
8 We demonstrate the utility of this system through modification of replication loci via Cre  
9 recombinase, both *in vitro* and *in vivo*, and restriction endonuclease treatments.

10

## 1 INTRODUCTION

2 Yeast (*S. cerevisiae*) has long served as a premier experimental system for exploring eukaryotic  
3 genetics and cell biology (Botstein and Fink 2011) and has more recently emerged as a  
4 preferred system in synthetic biology (Lee *et al.* 2015). A key component of the yeast genetic  
5 toolkit is the availability of shuttle vectors, plasmids capable of replication and selection when  
6 introduced into either a yeast or *E. coli* cell (Sikorski and Hieter 1989; Da Silva and Srikrishnan  
7 2012). In their original design, yeast shuttle vectors would typically be modified *in vitro* and  
8 subsequently propagated in bacterial cells to generate a desired gene construct that could be  
9 later introduced into yeast to study eukaryotic cell biology. In current practice the classical  
10 bacteria-then-yeast workflow is often turned on its head by gene synthesis techniques that  
11 capitalize upon the readiness of yeast to piece together compatible DNA fragments via  
12 homologous recombination (Gibson 2009), so initial gene synthesis and molecular cloning steps  
13 often start inside the yeast cell.

14 Yeast shuttle vectors vary in their selectable markers, typically genes for auxotrophic  
15 rescue or antibiotic resistance, and in the presence or absence of a yeast replication locus.  
16 Yeast integrating plasmids lack an independent replication locus and must be incorporated into  
17 a chromosome in order to replicate. Low copy, centromeric plasmids contain an autonomous  
18 replicating sequence (ARS) to initiate DNA replication and a centromere (*CEN*) to support  
19 plasmid inheritance during cell division. High copy, episomal vectors carry the  $2\mu$  circle  
20 replicating origin. Low and high copy plasmids offer convenience for gene expression studies  
21 and functional analyses, but both varieties of replicating plasmids have demonstrated instability  
22 in their copy numbers (Futcher and Carbon 1986; Mead *et al.* 1986; Resnick *et al.* 1990). When

1 considering the possible toxicity of plasmid-encoded gene or combination of genes, or even the  
2 energetic cost of maintaining the plasmid itself (Mead *et al.* 1986), unstable copy numbers of  
3 centromeric and 2 $\mu$  plasmids can present clear obstacles to experimental execution and  
4 interpretation. To ensure even copy number and consistent level of gene expression, some  
5 plasmid-encoded genes must be integrated into a chromosome, but such necessity is often  
6 realized after experimentation with expression from replicating plasmids. Ability to switch  
7 between low copy, high copy and integrating shuttle vector strategies is a key feature of the  
8 yeast genetics toolkit.

9       Previous efforts in improving resources for yeast shuttle vectors have focused heavily on  
10 engineering sequences flanking the yeast selectable marker loci to offer convenient removal  
11 and remodeling (Gueldener *et al.* 2002; Carter and Delneri 2010; Fang *et al.* 2011; Chee and  
12 Haase 2012; Agaphonov and Alexandrov 2014; Siddiqui *et al.* 2014; Jensen *et al.* 2014), either in  
13 the plasmid or after chromosomal integration. By comparison, the replication loci of the shuttle  
14 vectors have been neglected. We believe a similar level of utility is achieved by engineering the  
15 yeast replication loci of shuttle vectors to be removed and remodeled in analogous manner.

16       We have modified the popular family of pRS shuttle vectors (Sikorski and Hieter 1989;  
17 Christianson *et al.* 1992) plasmid shuttle vectors to include yeast replication loci flanked by LoxP  
18 sites or triplicate endonuclease cut sites. We demonstrate the utility and flexibility of this  
19 system through in vivo and in vitro remodeling of the yeast replication loci and the rapid  
20 generation of a complete suite of integrating, low copy and high copy plasmids to support  
21 functional analysis in yeast.

## 1 RESULTS & DISCUSSION

### 2 *pDN5xx & pDN6xx vector series*

3 While several families of yeast shuttle vectors have been deployed over nearly four decades  
4 (reviewed in Da Silva and Srikrishnan 2012), availability of the pRS series of vectors (Sikorski and  
5 Hieter 1989; Christianson *et al.* 1992) was a landmark in yeast genetics; the plasmids were  
6 rapidly adopted by the field and their use remains ubiquitous due to several useful features  
7 (Figure 1 A): i/ yeast auxotrophic selection markers (*HIS3*, *TRP1*, *LEU2* or *URA3*) are compatible  
8 with engineered auxotrophies in many of the most commonly used yeast laboratory strains  
9 (Sherman 2002); ii/ plasmid selection in bacteria via ampicillin resistance; iii/ bacterial origins of  
10 replication that produce high copy number and high plasmid yield upon extraction from  
11 bacteria; iv/ a large polylinker or multiple cloning site (MCS) with a selection of unique  
12 endonuclease cut sites to enable insertion of new DNA sequences; v/ T3 and T7 phage  
13 promoters flanking the MCS to permit *in vitro* RNA transcription; and vi/ a  $\beta$ -galactosidase  
14 coding region overlapping the MCS to permit colorimetric screening of bacterial colonies for  
15 successful integration of DNA insert.

16 In designing the pDN500 and -600 series (Figure 1 A), we honored the original  
17 numbering convention of the pRS series in which the second numeral indicates the yeast  
18 replication locus ('0' for none, '1' for centromeric, and '2' for  $2\mu$ ) and the third indicates the  
19 yeast selectable marker ('3' for *HIS3*, '4' for *TRP1*, '5' for *LEU2*, and '6' for *URA3*). In the  
20 pDN500-series, yeast replication loci are flanked by pairs of restriction endonuclease cut sites,  
21 enabling targeted *in vitro* removal of either *CEN* or  $2\mu$  loci. The trio of AatII, AatII and SphI were  
22 selected because these enzymes are commonly used for laboratory cloning and lack cut sites

1 elsewhere in the pRS and pDN family of vectors, excepting that AvrII cuts in the *HIS3* locus,  
2 consistent with characterization of the pRS vectors by (Chee and Haase 2012). Three pairs of  
3 flanking endonuclease cut sites were included to maximize the likelihood that at least one pair  
4 of cut sites should remain available to modify the replication locus in case further DNA inserts  
5 might contain cut sites for one or two of these enzymes. Importantly, removal of the replication  
6 locus by flanking restriction digest supports either elimination of the locus by plasmid re-  
7 circularization or substitution of an alternative replication locus.

8         The pDN61x and -62x series of vectors allow remodeling of yeast replication loci via a  
9 pair of parallel, flanking *LoxP* sequences, offering options to remodel the plasmid by *Cre*  
10 recombinase activity either *in vivo* or *in vitro*. The *Cre-Lox* recombination strategy offers the  
11 further advantage that the option to remodel a yeast replication locus will persist regardless of  
12 what further DNA sequences might be inserted into the plasmid, provided no additional *LoxP*  
13 sites are included. pDN600-series vectors also include a pair of flanking *AatII* cut sites on either  
14 side of the replication loci, so remodeling options available to the pDN500-series also apply.

15

#### 16         *Conversion of replicating plasmids to integrating plasmids using Cre recombinase*

17 We demonstrated working procedures for remodeling replication loci in the pDN600-series  
18 using plasmid pJM1 (Figure 2 A), generated by incorporating a gene (*GFP-CPS*) encoding GFP-  
19 tagged transmembrane endosomal cargo reporter carboxypeptidase S into the centromeric,  
20 uracil-selected vector pDN616. Chromosomal integration is particularly useful for plasmids  
21 encoding fluorescent reporters, since uneven expression across a population of cells can result  
22 in a range of signal intensities and possible phenotypes. We converted pJM1 into a replication-

1 deficient, integrating plasmid (pJM3) via Cre recombinase activity toward the LoxP-flanked  
2 *CEN/ARSH4* locus. We passaged pJM1 through *E. coli* strain N2114Sm (Seifert *et al.* 1986) that  
3 stably expresses Cre. Plasmid DNA was extracted from ampicillin-selected N2114Sm colonies  
4 and used to transform *E. coli* strain TOP10F' for the dual purpose of filtering the polyclonal  
5 plasmid population immediately derived from N2114Sm and achieving a higher yield of plasmid  
6 DNA. Restriction analysis of the resulting pJM3 candidates revealed that neither candidate  
7 retained the AatII cut sites that flank the *CEN/ARSH4* locus in pJM1 (Figure 2 B). Digestion with  
8 a combination of EcoRV and PvuI further confirmed that a pJM1 restriction product containing  
9 the *CEN/ARSH4* locus (1834 bp) was absent in pJM3 candidates, but that the restriction  
10 fragment at ~1250 bp in pJM3 had doubled in relative intensity, indicating the presence of two  
11 fragments, consistent with the 1834 bp fragment being reduced to 1250 bp by removal of the  
12 *CEN/ARSH4* sequence by successful Cre-Lox recombination.

13 We confirmed competence of pJM3 as an integrating plasmid by cutting at the unique  
14 SacII recognition site in the *PRC1* promoter sequence driving expression of *GFP-CPS*, producing  
15 linearized pJM3 with end sequences to direct integration via homologous recombination into  
16 the chromosomal *PRC1* promoter. We transformed linearized pJM3 into wild type yeast and a  
17 *vps4Δ* mutant strain that suffers an endosome maturation defect preventing formation of  
18 luminal vesicles (Babst *et al.* 1997), confirmed integration in colonies selected on media lacking  
19 uracil, and cultured cells under non-selective conditions prior to pulse-labeling with a  
20 fluorescent endocytic membrane dye, FM4-64 (Vida and Emr 1995) to stain the perimeter of  
21 the yeast vacuole. GFP-CPS transits via the biosynthetic pathway from Golgi to endosome  
22 where it is sorted into luminal endosomal vesicles (Odorizzi *et al.* 1998). Luminal vesicles and

1 GFP-CPS cargo are delivered to the vacuole lumen when endosomes fuse with the vacuole, so  
2 in wild type cells GFP signal appeared inside the FM4-64-stained vacuole membrane (Figure 2  
3 C). Loss of the gene *VPS4* (*vps4Δ*) disrupts the ability of endosomes to invaginate and form  
4 luminal vesicles, so GFP-CPS remains at the outer membrane of endosomes and is delivered  
5 instead to the outer membrane of the vacuole, co-localizing with FM4-64 at the vacuole  
6 membrane and at perivacuolar endosomal compartments (Figure 2 C). These observations are  
7 consistent with previous studies (Odorizzi *et al.* 1998) and confirm performance of the pDN600  
8 series in converting to integration-competent vectors.

9 We further examined whether Cre would remove LoxP-flanked 2 $\mu$  replication loci. We  
10 passaged the high copy vector pDN624 through Cre-expressing bacteria via the same procedure  
11 described above. Restriction analysis using endonuclease EcoRI revealed that all Cre-treated  
12 candidates had been reduced in length ~1400 bp compared to untreated pDN624 (Figure 3 A),  
13 consistent with the predicted loss of 1390 bp due to Cre recombination of the *LoxP::2 $\mu$ ::LoxP*  
14 cassette. Purified Cre enzyme is readily available from commercial suppliers, so we also  
15 examined whether LoxP-flanked yeast replication loci could be removed *in vitro*. Cre-treatment  
16 of high copy plasmids pDN624 and pDN626 for only thirty minutes resulted in modification of a  
17 substantial subpopulation of the plasmids (Figure 3 B). Treated samples possessed bands  
18 representing unmodified pDN624 and pDN626 as well as an additional band ~1400 bp shorter  
19 in length, consistent with the predicted loss of 1390 bp from each after *LoxP::2 $\mu$ ::LoxP*  
20 recombination. Users of the pDN600 series therefore have the option to conduct Cre-mediated  
21 remodeling of the yeast replication locus either *in vivo* or *in vitro*.

22



1            *Generation of integrating plasmids by restriction digest to excise plasmid replication loci*

2    We explored the plasticity of the pDN500-series by generating a full suite of replicating and  
3    integrating plasmid vectors expressing a mutant allele (*L291A*, *L292A*—or ‘*LALA*’) of the SNARE  
4    disassembly adaptor protein Sec17 (Schwartz *et al.* 2017). We generated a *sec17<sup>LALA</sup>* PCR  
5    product with ends homologous to the ends of SacI-digested pDN516, inserting *sec17<sup>LALA</sup>* into  
6    pDN516 via co-transformation into yeast cells for plasmid gap repair by homologous  
7    recombination (Figure 4 A). The resulting low copy, centromeric plasmid (pDN366) was  
8    subsequently converted to a non-replicating, integrating plasmid by digesting pDN366 with  
9    AatII and re-circularizing with T4 ligase to remove the *CEN/ARSH4* locus, resulting in pDN370. In  
10   order to generate a high copy plasmid to overexpress *sec17<sup>LALA</sup>*, pDN370 was again cut with  
11   AatII to make linear ends available for insertion of the  $2\mu$  locus. We examined efficiency of  $2\mu$   
12   locus insertion into pDN370 via Gibson assembly (Gibson *et al.* 2009), which like gap repair  
13   cloning in yeast also relies upon overlapping homologous sequences at the ends of vector and  
14   insert, resulting in pDN369.

15            All three versions of the *sec17<sup>LALA</sup>* plasmid suite produce a 6185 bp band upon AatII  
16   digestion (Figure 4 B), representing the *sec17<sup>LALA</sup>* gene insert and the remainder of the common  
17   plasmid backbone that lacks the yeast replication locus. pDN366 and pDN369 also produce AatII  
18   restriction fragments at 563 or 1369 bp, representing *CEN/ARSH4* or  $2\mu$  loci, respectively.  
19   Candidate plasmids examined after recircularization of pDN366 to produce pDN370 all lack the  
20   563 bp *CEN/ARSH4* locus (Figure 4 C), which was expected given the known robustness of the  
21   recircularization technique. Screening ten candidate plasmids for high copy pDN369 generated  
22   by Gibson assembly also revealed a high degree of successful  $2\mu$  locus insertion (80%).

1           The workflow described in Figure 4 works equivalently if the starting vector is high copy  
2   ( $2\mu$ ) instead of low copy (*CEN/ARSH4*); such an alternative workflow was used to generate  
3   LUCID family cargo transport reporter plasmids (Nickerson *et al.* 2012; Nickerson and Merz  
4   2015) in which multiple genes expressing chimeric reporter enzymes were inserted at the MCS,  
5   so the ability to remodel the replication loci of the plasmids was far preferable to subcloning  
6   large, multi-component gene inserts.

7           A further convenience of a standard family of yeast shuttle vectors with ability to  
8   remodel the replication loci is the limited number of needed reagents for a research lab to  
9   stock. Indeed, remodeling operations demonstrated in this study could be performed using the  
10   enzymes AatII, Cre, and T4 ligase, plus frozen stocks of *CEN/ARSH4* and  $2\mu$  PCR products ready  
11   to insert.

12           Future improvements to shuttle vector systems could merge the benefits of targeted  
13   removal or remodeling of both the yeast replication loci and the yeast selectable markers. The  
14   use of Cre-Lox recombination in the pDN600-series presents an incompatibility with the  
15   commonly used Cre-Lox removal of selectable marker loci, but there are several alternative  
16   recombinase enzymes and recognition sequences available to incorporate.

## 1 MATERIALS & METHODS

### 2 *Media and reagents*

3 Standard methods were used for culture and storage of yeast and bacteria (Guthrie and Fink  
4 2002). All media and reagents were purchased from Sigma-Aldrich (Saint Louis, MO) or Thermo  
5 Fisher (Waltham, MA), unless otherwise specified. All enzymes were purchased from New  
6 England Biolabs (Ipswich, MA) unless otherwise specified. High fidelity KOD Hot Start  
7 polymerase was purchased from Novagen/EMD Millipore (Darmstadt, Germany). DNA  
8 restriction digests, T4 DNA ligase reactions and PCR reactions were all performed according to  
9 manufacturer instructions. Oligonucleotide synthesis was performed by Integrated DNA  
10 Technologies (Corralville, IA). Hyperladder I (Bioline) was used as linear DNA size standard.

11

### 12 *DNA manipulations and reagents*

13 Strains and plasmids used in this study are described in Table I. Oligonucleotides used in this  
14 study are described in Table II. In constructing the pDN51x or pDN52x plasmid series, PCR  
15 primer pairs (DN652p & DN653p or DN1016p & DN1017p) were designed to amplify either the  
16 *CEN/ARSH4* locus or the high copy  $2\mu$  locus from pRS415 or pRS425 templates, respectively,  
17 while incorporating AatII, AvrII, and SphI restriction sites ('3X') flanking the loci. To construct the  
18 pDN61x plasmid series, PCR primer pairs (DN648p & DN649p or MQ1p & MQ2p) were designed  
19 to amplify *CEN/ARSH4* or  $2\mu$  loci from pRS415 or pRS425 templates, respectively, while  
20 incorporating parallel LoxP sequences flanking the loci. After successful high-fidelity PCR  
21 amplification, template plasmid DNA was degraded by treatment with DpnI restriction enzyme  
22 prior to precipitation of PCR product and resuspension in 0.1M LiOAc 2mM Tris pH 7.9. The

1 resulting *LoxP*::*CEN/ARSH4*::*LoxP*, *LoxP*::*2μ*::*LoxP*, *3X*::*CEN/ARSH4*::*3X* and *3X*::*2μ*::*3X* PCR  
2 products were co-transformed into yeast (*S. cerevisiae*) with AatII-digested pRS403, pRS404,  
3 pRS405 or pRS406 linearized vectors using a lithium acetate-based protocol described below.  
4 Homologous recombination of the replication loci and linearized integrating vectors yielded  
5 new, low- and high-copy replicating vectors. pDN5xx- and pDN6xx-series plasmid candidates  
6 were screened and confirmed by restriction digest, DNA sequencing, competence for Cre-  
7 mediated recombination, and ability to support yeast and bacterial colony growth after  
8 transformation and plating onto selective media.

9         Yeast high-efficiency DNA transformation protocol for recircularization of linearized  
10 plasmid vectors by homologous recombination with compatible DNA insert was adapted from  
11 (Gietz *et al.* 1992). Cells were shaken overnight in YPD media at 30°C. Saturated cultures were  
12 diluted to OD<sub>600</sub> ~0.1 and shaken under identical conditions until cells reached log phase  
13 density (OD<sub>600</sub> = 0.4-0.6). Cells were collected by low speed centrifugation and rinsed in 0.1M  
14 LiOAc 2mM Tris pH 7.9. Cell pellets were resuspended in 50 μL 0.1M LiOAc 2mM Tris pH 7.9  
15 containing either resuspended PCR product ('insert') or no PCR product as a negative control.  
16 Cell suspensions were further supplemented with 10-50 μg boiled salmon sperm DNA and  
17 approximately 25 ng linearized plasmid vector before dilution with 700 μL 40% PEG (w/v) in  
18 0.1M LiOAc 2mM Tris pH 7.9. Cell suspensions were vortexed 10-20 seconds and incubated at  
19 30°C for 15-30 minutes. Cell suspensions were supplemented with 5% (v/v) DMSO and vortexed  
20 another 10 seconds prior to a heat shock incubation at 42°C for 30 minutes. Cells were  
21 collected by low speed centrifugation and resuspended in 0.1M LiOAc 2mM Tris pH 7.9 prior to  
22 spreading on selective agar media.

1 Plasmid DNA was recovered from yeast by DNA extraction using the ‘smash and grab’  
2 protocol (Rose *et al.* 1990) of glass bead cell lysis, phenol-chloroform extraction and ethanol  
3 precipitation of the aqueous phase to yield genomic and plasmid DNA. Plasmids were separated  
4 from genomic DNA by electroporation of *E. coli* and plating of cells to LB agar media with  
5 ampicillin (100 µg/mL). Plasmids were recovered from bacteria using a QIAgen plasmid  
6 miniprep kit (Qiagen, Valencia, CA). DNA sequencing reactions of replication loci using flanking  
7 primers DN661p or DN837p was performed by Genewiz (South Plainfield, NJ). Sequencing  
8 alignments were performed using SnapGene software (GSL Biotech, San Diego, CA).

9 All restriction endonuclease digests of plasmids were performed according to  
10 manufacturer’s instructions (New England Biolabs).

11 Cre-mediated removal of *LoxP*-flanked replication loci from pDN61x- and pDN62x-series  
12 vectors was accomplished *in vivo* by chemical transformation of an *E. coli* strain expressing Cre  
13 recombinase, N2114Sm (Seifert *et al.* 1986). Ampicillin-selected colonies were picked and  
14 grown in LB media supplemented with ampicillin (50 µg/mL) before plasmid extraction via  
15 QIAgen plasmid miniprep. Plasmid yields from N2114Sm host strain are low, so purified plasmid  
16 candidates were further passaged through TOP10F’ *E. coli* (Invitrogen, Carlsbad, CA) via  
17 chemical transformation and QIAgen plasmid miniprep extraction.

18 Cre-mediated removal of *LoxP*-flanked replication loci from pDN62x-series vectors was  
19 accomplished *in vitro* treating 250 ng plasmid with purified Cre recombinase enzyme (New  
20 England Biolabs) in 50 µL reaction per manufacturer instructions, incubating at 37°C for 30  
21 minutes. Resulting polyclonal Cre recombinase reactions were heat inactivated and plasmid

1 DNA was precipitated twice using ethanol prior to restriction digest and electrophoretic  
2 analysis.

3 Plasmid pJM1 was constructed via PCR amplification of the *PRC1* promoter-driven *GFP*-  
4 *CPS1* cassette from plasmid template pGO45 (Odorizzi *et al.* 1998) using primers DN680p and  
5 DN693p, creating a PCR product with ends overlapping the ends of PvuII-cut vector pDN616.  
6 PCR template was eliminated by DpnI digestion. PvuII cuts on either side of the multiple cloning  
7 site (MCS), removing the MCS entirely, thus eliminating many redundant endonuclease cut  
8 sites. PCR product and PvuII-cut pDN616 were co-transformed into yeast to perform  
9 homologous recombination plasmid repair as described above. Transformants were selected on  
10 agar media lacking uracil to select circularized plasmids. pJM1 was modified to generate pJM3  
11 by removal of the *LoxP*-flanked *CEN/ARSH4* locus by passaging pJM1 through Cre-expressing  
12 strain N2114Sm as described above. pJM3 was linearized for chromosomal integration by *Sac*II  
13 digestion of the unique cut site in the *PRC1* promoter sequence, generating linear ends capable  
14 of mediating homologous recombination at the *PRC1* chromosomal locus. Strains SEY6210 and  
15 MBY3 were both transformed using *Sac*II-cut pJM3 using the high-efficiency protocol described  
16 above.

17 Plasmids expressing the *L291A*, *L292A* mutant of *SEC17* (*sec17<sup>LALA</sup>*) driven by 500 bp  
18 native *SEC17 promoter* were constructed via an overlap extension PCR scheme in which the  
19 overlapping sequences of primers DN982p and DN983p introduced the *LALA* mutation. Flanking  
20 primers DN927p and DN928p included 35 and 34 bp, respectively, sequence overlapping the  
21 linear ends of *Sac*I-digested pDN516, allowing insertion of *sec17<sup>LALA</sup>* PCR product into the  
22 pDN516 MCS via homologous recombination plasmid repair, resulting in pDN366. *Aat*II digest of

1 pDN366 linearized the plasmid and removed the *CEN/ARSH4* locus. Compatible AatII overhangs  
2 were ligated together using T4 ligase, omitting the *CEN/ARSH4* locus and resulting in pDN370.  
3 Insertion of  $2\mu$  replication locus PCR product into AatII-digested pDN370 via Gibson cloning was  
4 performed essentially as described (Gibson *et al.* 2009), resulting in pDN369. PCR primers  
5 DN652p and DN653p used to amplify the  $2\mu$  locus include 30 bp overhangs homologous to ends  
6 of AatII-digested pDN5xx vectors, making them suitable to mediate both homologous  
7 recombination plasmid repair in yeast and *in vitro* overlap extension via Gibson cloning.

8

### 9 *Imaging*

10 Pulse-chase labeling of log phase yeast with vacuolar fluorescent dye FM4-64 and fluorescence  
11 microscopy imaging were performed as described (Nickerson *et al.* 2012), except that cells  
12 were grown in non-selective YPD prior to labeling and imaging. DNA in agarose gels was stained  
13 using ethidium bromide and visualized using ultraviolet light in a BioRad Chemi-doc system with  
14 digital camera and Quantity One imaging software (BioRad, Hercules, CA). All gel images were  
15 exported from Quantity One as .TIFF images, except Figure 2 panel B, which was printed to  
16 photographic paper and later scanned in .TIFF format using an Epson flatbed scanner. Images  
17 were cropped using Adobe Photoshop CS6 (Adobe, San Jose, CA). Fluorescence microscopy  
18 images were overlaid using ImageJ (NIH, <https://imagej.nih.gov/ij/>). Images were arranged as  
19 annotated figures using Canvas Draw 4 vector graphics software (Canvas GFX, Boston, MA).

20

21

22

1            *Supplementary materials and reagent requests*

2    Vector sequence files and maps may be downloaded in SnapGene format (.dna) as  
3    supplementary files. Plasmid vectors in the pDN51x, pDN52x, pDN61x, and pDN62x vector  
4    series will be deposited at AddGene (Cambridge, MA). Direct reagent requests to the Nickerson  
5    Lab should please provide a self-addressed, stamped envelope, mailed to ‘Attn: Nickerson,  
6    5500 University Pkwy, CSUSB Biology Dept, Rm BI-302, San Bernardino, CA 92407-2318.’

7

8

9    **AUTHOR CONTRIBUTIONS**

10    DPN conceived of the project. DPN and MAQ conceived and designed experiments. DPN, JMM  
11    and MAQ performed experiments and analyzed results. DPN wrote the manuscript with editing  
12    contributions from MAQ and JMM.

13

14

15    **ACKNOWLEDGMENTS**

16    This work was supported by grants from the CSUSB Office of Student Research to MAQ and  
17    DPN, charitable donations to the Nickerson Lab Research Fund (CSUSB), and NIH/NIGMS RO1  
18    GM077349 to AJM (University of Washington).



## TABLES

**Table I.** Plasmids and strains used in this study.

| Name                 | Genotype/Description                                                                                                                                                                   | Source/Reference                  |
|----------------------|----------------------------------------------------------------------------------------------------------------------------------------------------------------------------------------|-----------------------------------|
| <i>Plasmids</i>      |                                                                                                                                                                                        |                                   |
| pDN613               | Amp <sup>R</sup> <i>HIS3</i> <i>LoxP</i> :: <i>CEN/ARSH4</i> :: <i>LoxP</i>                                                                                                            | This study                        |
| pDN614               | Amp <sup>R</sup> <i>TRP1</i> <i>LoxP</i> :: <i>CEN/ARSH4</i> :: <i>LoxP</i>                                                                                                            | (Shideler <i>et al.</i> 2015)     |
| pDN615               | Amp <sup>R</sup> <i>LEU2</i> <i>LoxP</i> :: <i>CEN/ARSH4</i> :: <i>LoxP</i>                                                                                                            | (Paulsel <i>et al.</i> 2013)      |
| pDN616               | Amp <sup>R</sup> <i>URA3</i> <i>LoxP</i> :: <i>CEN/ARSH4</i> :: <i>LoxP</i>                                                                                                            | (Nickerson <i>et al.</i> 2012)    |
| pDN623               | Amp <sup>R</sup> <i>HIS3</i> <i>LoxP</i> ::2μ:: <i>LoxP</i>                                                                                                                            | This study                        |
| pDN624               | Amp <sup>R</sup> <i>TRP1</i> <i>LoxP</i> ::2μ:: <i>LoxP</i>                                                                                                                            | This study                        |
| pDN625               | Amp <sup>R</sup> <i>LEU2</i> <i>LoxP</i> ::2μ:: <i>LoxP</i>                                                                                                                            | This study                        |
| pDN626               | Amp <sup>R</sup> <i>URA3</i> <i>LoxP</i> ::2μ:: <i>LoxP</i>                                                                                                                            | This study                        |
| pDN513               | Amp <sup>R</sup> <i>HIS3</i> 3X:: <i>CEN/ARSH4</i> ::3X                                                                                                                                | This study                        |
| pDN514               | Amp <sup>R</sup> <i>TRP1</i> 3X:: <i>CEN/ARSH4</i> ::3X                                                                                                                                | This study                        |
| pDN515               | Amp <sup>R</sup> <i>LEU2</i> 3X:: <i>CEN/ARSH4</i> ::3X                                                                                                                                | This study                        |
| pDN516               | Amp <sup>R</sup> <i>URA3</i> 3X:: <i>CEN/ARSH4</i> ::3X                                                                                                                                | This study                        |
| pDN523               | Amp <sup>R</sup> <i>HIS3</i> 3X::2μ::3X                                                                                                                                                | This study                        |
| pDN524               | Amp <sup>R</sup> <i>TRP1</i> 3X::2μ::3X                                                                                                                                                | (Lobingier <i>et al.</i> 2014)    |
| pDN525               | Amp <sup>R</sup> <i>LEU2</i> 3X::2μ::3X                                                                                                                                                | This study                        |
| pDN526               | Amp <sup>R</sup> <i>URA3</i> 3X::2μ::3X                                                                                                                                                | (Nickerson <i>et al.</i> 2012)    |
| pJM1                 | Amp <sup>R</sup> <i>URA3</i> <i>LoxP</i> :: <i>CEN/ARSH4</i> :: <i>LoxP</i> <i>PRC1pr</i> :: <i>GFP-CPS1</i>                                                                           | This study                        |
| pJM3                 | Amp <sup>R</sup> <i>URA3</i> <i>LoxP</i> <i>PRC1pr</i> :: <i>GFP-CPS1</i>                                                                                                              | This study                        |
| pDN314               | Amp <sup>R</sup> <i>URA3</i> 3X::2μ::3X <i>SEC17</i>                                                                                                                                   | (Lobingier <i>et al.</i> 2014)    |
| pDN366               | Amp <sup>R</sup> <i>URA3</i> 3X:: <i>CEN/ARSH4</i> ::3X <i>sec17</i> <sup>L291A/L292A</sup>                                                                                            | This study                        |
| pDN369               | Amp <sup>R</sup> <i>URA3</i> 3X::2μ::3X <i>sec17</i> <sup>L291A/L292A</sup>                                                                                                            | (Schwartz <i>et al.</i> 2017)     |
| pDN370               | Amp <sup>R</sup> <i>URA3</i> <i>sec17</i> <sup>L291A/L292A</sup>                                                                                                                       | This study                        |
| pRS403               | Amp <sup>R</sup> <i>HIS3</i>                                                                                                                                                           | (Sikorski and Hieter 1989)        |
| pRS404               | Amp <sup>R</sup> <i>TRP1</i>                                                                                                                                                           | (Sikorski and Hieter 1989)        |
| pRS405               | Amp <sup>R</sup> <i>LEU2</i>                                                                                                                                                           | (Sikorski and Hieter 1989)        |
| pRS406               | Amp <sup>R</sup> <i>URA3</i>                                                                                                                                                           | (Sikorski and Hieter 1989)        |
| pRS415               | Amp <sup>R</sup> <i>LEU2</i> <i>CEN/ARSH4</i>                                                                                                                                          | (Sikorski and Hieter 1989)        |
| pRS425               | Amp <sup>R</sup> <i>LEU2</i> 2μ                                                                                                                                                        | (Christianson <i>et al.</i> 1992) |
| pGO45                | Amp <sup>R</sup> <i>URA3</i> 2μ <i>PRC1pr</i> :: <i>GFP-CPS1</i>                                                                                                                       | (Odorizzi <i>et al.</i> 1998)     |
| <i>E. coli</i>       |                                                                                                                                                                                        |                                   |
| TOP10F'              | <i>[lacI<sup>q</sup> Tn10(tet<sup>R</sup>)] mcrA Δ(mrr-hsdRMS-mcrBC)φ80lacZ ΔM15 ΔlacX74 deoR nupG recA1 araD139Δ(ara-leu)7697 galU galK rpsL(Str<sup>R</sup>) endA1 λ<sup>-</sup></i> | Invitrogen                        |
| N2114Sm              | F <sup>-</sup> <i>recA</i> λ- <i>cre</i> <i>rpsL</i>                                                                                                                                   | (Seifert <i>et al.</i> 1986)      |
| <i>S. cerevisiae</i> |                                                                                                                                                                                        |                                   |
| SEY6210              | <i>MATα leu2-3,112 ura3-52 his3-200 trp1-901 lys2-801 suc2-9</i>                                                                                                                       | (Robinson <i>et al.</i> 1988)     |
| MBY3                 | SEY6210 <i>vps4Δ</i> :: <i>TRP1</i>                                                                                                                                                    | (Babst <i>et al.</i> 1997)        |
| JMY1                 | SEY6210 <i>GFP-CPS1</i> (pJM3:: <i>URA3</i> )                                                                                                                                          | This study                        |
| JMY2                 | MBY3 <i>GFP-CPS1</i> (pJM3:: <i>URA3</i> )                                                                                                                                             | This study                        |

**Table II.** Primer sequences used in this study. Sequences to mediate homologous recombination shown in **bold**. LoxP sequences shown in *italics*. Restriction site sequences shown as underlined. PCR annealing sequences shown in lowercase.

DN648p: Rev, PCR amplify *CEN/ARSH4* sequence, incorporate LoxP sequence and AatII restriction site, mediate repair of AatII-digested pRS40x vector.

5' **GGTTAATGTCATGATAATAATGGTTTCTTAATAACTTCGTATAGCATACATTATACGAAGTTATGACGT**  
Cggacggatcgcttgccctg-3'

DN649p: Fwd, PCR amplify *CEN/ARSH4* sequence, incorporate LoxP sequence and AatII restriction site, mediate repair of AatII-digested pRS40x vector.

5' **CGCGCACATTTCCCCGAAAAGTGCCACCTATAACTTCGTATAATGTATGCTATACGAAGTTATTGACGT**  
Ccccgaaaagtgcacctg-3'

DN652p: Fwd, PCR amplify *CEN/ARSH4* sequence, incorporate triplicate restriction sites, mediate repair of AatII-digested pRS40x or pDN50x vectors.

5' **CACATTTCCCCGAAAAGTGCCACCTGACGTCCTAGGCATGC**Cggtcctttcatcacgtgc-3'

DN653p: Rev, PCR amplify *CEN/ARSH4* sequence, incorporate triplicate restriction sites, mediate repair of AatII-digested pRS40x or pDN50x vectors.

5' **ATGTCATGATAATAATGGTTTCTTAGACGTCCTAGGCATGC**gataataatggtttcttag-3'

DN1016p: Fwd, PCR amplify *2μ* sequence, incorporate triplicate restriction sites, mediate repair of AatII-digested pRS40x or pDN50x vectors.

5' **CACATTTCCCCGAAAAGTGCCACCTGACGTCCTAGGCATGC**Caacgaagcatctgtgcttcatt-3'

DN1017p: Rev, PCR amplify *2μ* sequence, incorporate triplicate restriction sites, mediate repair of AatII-digested pRS40x or pDN50x vectors.

5' **ATGTCATGATAATAATGGTTTCTTAGACGTCCTAGGCATGC**gatccaatatcaaaggaaatg-3'

MQ1p: Fwd, PCR amplify *2μ* locus, mediate insertion into AatII-digested pDN61x family vectors to create pDN62x family vectors.

5' **ATAATGTATGCTATACGAAGTTATTGACGT**caacgaagcatctgtgcttcatttg-3'

MQ2p: Rev, PCR amplify *2μ* locus, mediate insertion into AatII-digested pDN61x family vectors to create pDN62x family vectors.

5' **TATAGCATACATTATACGAAGTTATTGACGT**cgatccaatatcaaaggaaatgatagc-3'

DN661p: Sequencing primer for yeast replication loci, anneals near yeast selectable marker locus.

5' **tacaatctgctctgatgcc**-3'

DN837p: Sequencing primer for yeast replication loci, anneals in *AmpR* promoter.

5' **ttattgaagcatttatcaggg**-3'

DN680p: Rev, PCR amplify 200 bases of *CPS1* terminator to copy *CPYpr::GFP-CPS1* cassette, mediate repair of PvuII-digested pDN616.

5'**GATCGGTGCGGGCCTCTTCGCTATTACGCCAG**taaattttgattgacacttg-3'

DN693p: Fwd, PCR amplify 455 bases of *PRC1* promoter to copy *PRC1pr::GFP-CPS1* cassette, mediate repair of PvuII-digested pDN616.

5'**CCTCTCCCCGCGGTTGGCCGATTCATTAATGCAG**attgacagagcagtatgtgagg-3'

DN927p: Fwd, PCR amplify 500 bp *SEC17* promoter, mediate gap repair into SacI-digested pDN516.

5'**CTAGTTCTAGAGCGGCCGCCACCGCGGTGGAGCTC**ttctttgtcaattgcatctcta-3'

DN928p: Rev, PCR amplify 300 bp of *SEC17* terminator, mediate gap repair into SacI-digested pDN5xx.

5'**TAACCCTCACTAAAGGGAACAAAAGCTGGAGCTC**ggaagatccttacattacacg-3'

DN982p: Fwd, introduce *L291A L292A* ('LALA') mutation into *SEC17* via sequence overlap extension PCR, overlaps with DN983p.

5'ATCCAGCAACAAGAAGATGAT GCG GCA TGA acggcatatacttacgcgca-3'

DN983p: Rev, introduce *L291A L292A* ('LALA') mutation into *SEC17* via sequence overlap extension PCR, overlaps with DN982p.

5'TGCGCGTAAGTATATGCCGT TCA TGC CGC atcatcttctgttgctggat-3'

## FIGURES & LEGENDS

Figure 1

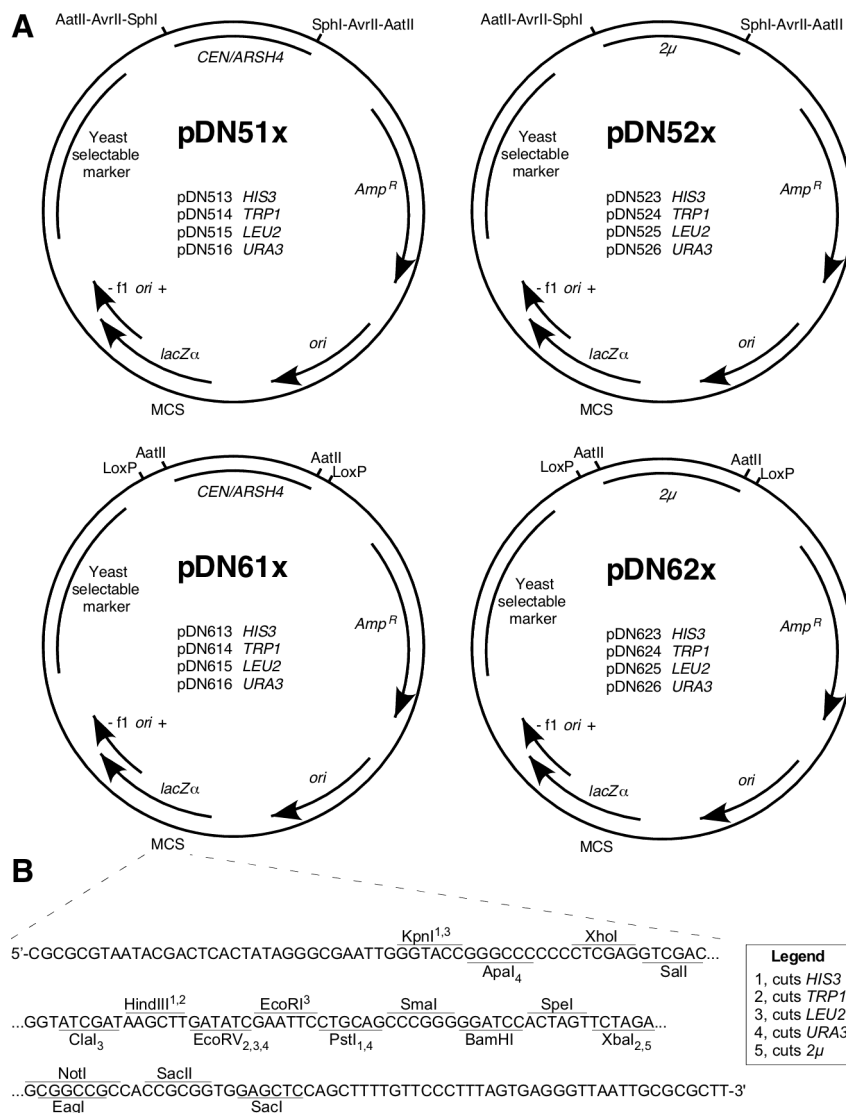

**Figure 1. Functional maps for pDN5xx and pDN6xx series of low-copy and high-copy vectors.**

A) Maps displaying consistent architectural features and specific functional differences of pDN5xx and pDN6xx families. Selected restriction enzyme cut sites and LoxP sequences flanking replication loci are displayed. B) Multiple cloning site (MCS) in focus, displaying nucleotide sequence of single strand (template strand for *lacZα*, β-galactosidase) and unique restriction enzyme cut sites. Subscript and superscript numerals with each enzyme indicate capacity for enzyme to cut yeast selectable marker loci as indicated in legend. *CEN*, centromeric sequence, low copy yeast replication locus. *ARSH4*, autonomous replicating sequence. *2μ*, yeast high copy replication locus. *Amp<sup>R</sup>*, ampicillin resistance gene (β-lactamase). *ori*, high copy *E. coli* origin or replication. *f1 ori*, f1 bacteriophage origin of replication. Plasmid loci depicted at approximate scale. Full plasmid sequences and annotated maps are available in Supplementary Materials.

Figure 2

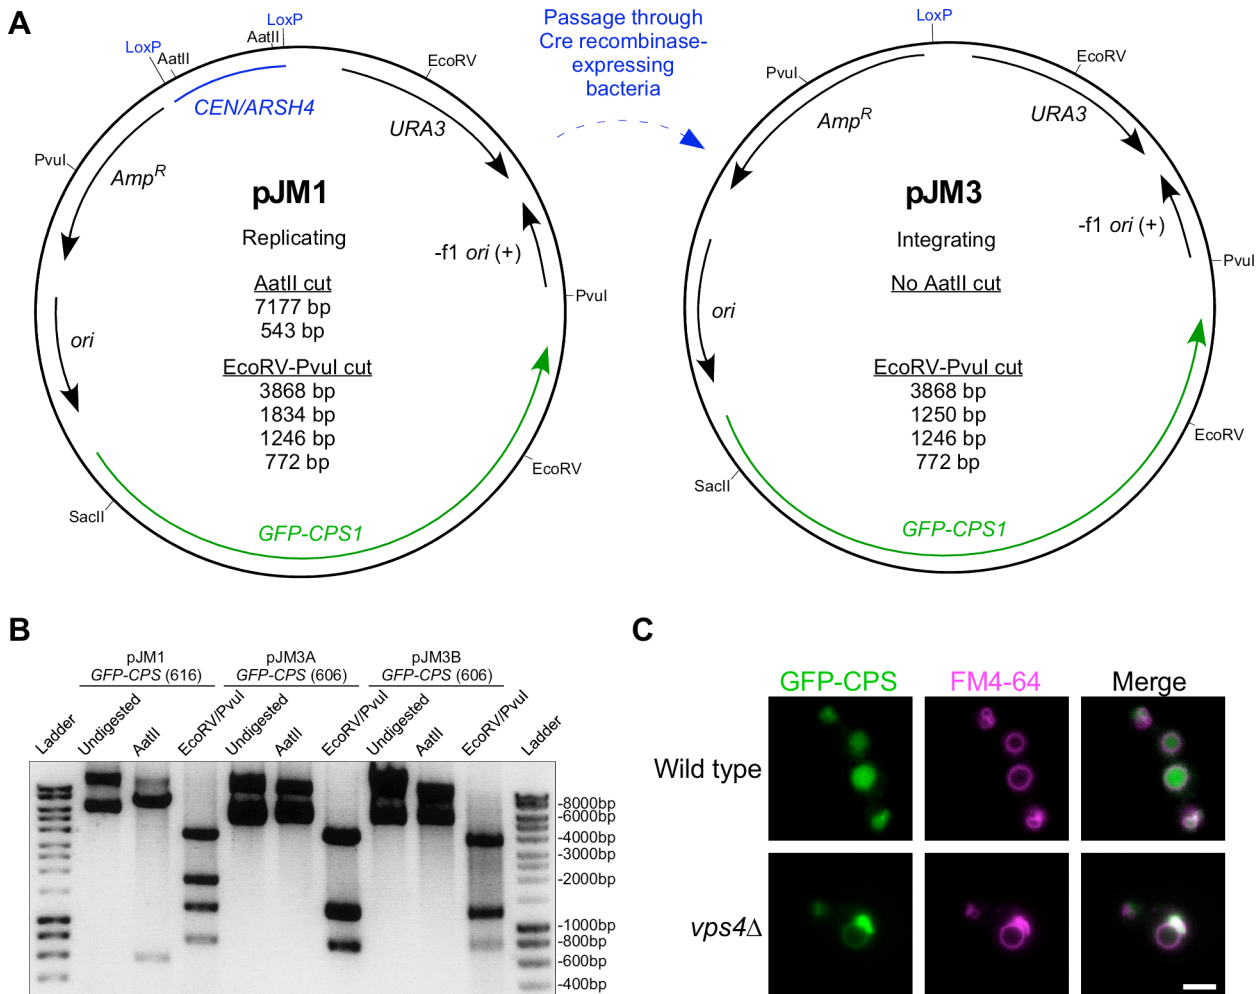

**Figure 2. Conversion of replicating, episomal vector to integrating vector via Cre recombinase.**

A) Plasmid maps of low copy replicating (pJM1) and integrating (pJM3) plasmids, including relevant endonuclease enzyme cut sites and predicted restriction fragment product sizes. B) Agarose gel electrophoretic analysis of restriction digest products derived from pre-Cre-treated plasmid pJM1 and post-Cre-treated plasmid pJM3 candidates A and B. Note that 1246 bp and 1250 bp fragments predicted from EcoRV-PvuII double digests of pJM3 appear as a single band. Undigested and uncut plasmids show high molecular weight bands representing supercoiled, nicked, and concatenated circular DNA whose gel migration should not be compared to linear ladder size standards. Unlabeled DNA ladder bands are of length halfway between neighboring labeled bands. C) Fluorescence microscopy of FM 4-64-labeled, logarithmic phase yeast expressing chromosomally integrated pJM3. pJM3 was digested with SacII to integrate in the chromosomal *PCR1* promoter. Chromosomal integrants were selected on media lacking uracil. Cells were cultured in non-selective media prior to imaging. Scale bar = 1  $\mu$ m.

Figure 3

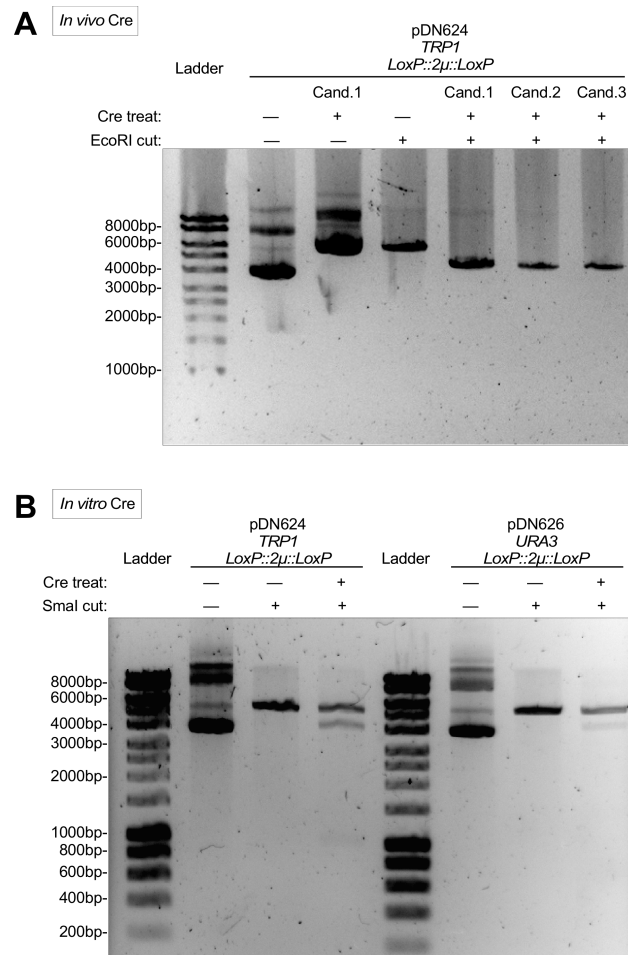

**Figure 3. Cre-mediated removal of 2 $\mu$  replication locus *in vivo* and *in vitro*.** A) Agarose gel electrophoretic confirmation of removal of 2 $\mu$  replication locus after passage of pDN624 through Cre-expressing bacterial strain N2114Sm. Each candidate represents a unique plasmid isolate from a single N2114Sm pDN624 colony. EcoRI-cut (linearized) pDN624 produces predicted bands of 5692 bp and 4302 bp before and after removal of 2 $\mu$  locus, respectively. B) Agarose gel electrophoretic confirmation of removal of 2 $\mu$  replication loci after *in vitro* treatment of pDN624 and pDN626 with Cre recombinase. Cre-treated samples represent polyclonal populations that include both unmodified (5692 bp for pDN624; 5802 bp for pDN626) and modified plasmids (4302 for pDN624; 4412 for pDN626). Unlabeled DNA ladder bands are of length halfway between neighboring labeled bands.

**Figure 4**

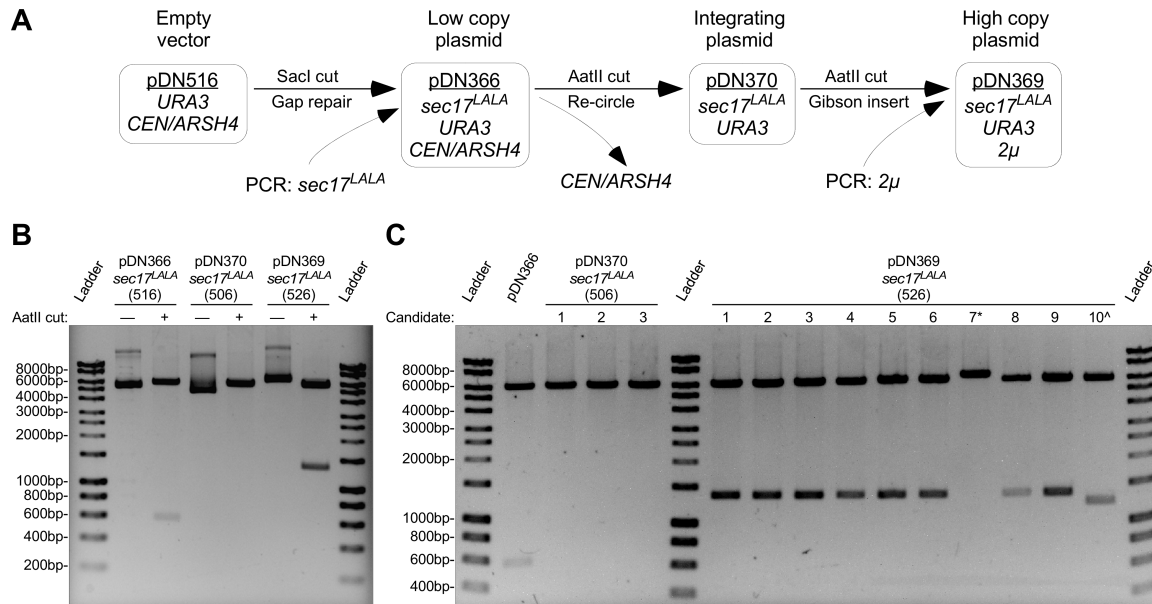

**Figure 4. Example workflow to generate low copy, high copy, and integrating plasmids from a common precursor.** A) Workflow schematic representing modification of original low copy replicating vector by insertion of a PCR product at MCS, followed by removal of original replication locus and replacement with high copy replication locus. B) Agarose gel electrophoresis and restriction enzyme analysis of plasmids resulting from demonstrated workflow. Observed AatII restriction fragments conform to predicted sizes: 6185 bp and 563 bp for pDN366; 6185 bp for pDN370; and 6185 bp and 1369 bp for pDN369. C) Agarose gel electrophoretic analysis of efficiency of removal of *CEN/ARSH4* replication locus and replacement with  $2\mu$  replication locus. All samples shown were digested with AatII to linearize vector (no replication locus) or cut on either side of replication locus. \* and ^ symbols indicate failed pDN369 candidates. Unlabeled DNA ladder bands are of length halfway between neighboring labeled bands.

## REFERENCES

- Agaphonov, M., and A. Alexandrov, 2014 Self-excising integrative yeast plasmid vectors containing an intronated recombinase gene. *FEMS Yeast Research* 14: 1048–1054.
- Babst, M., T. K. Sato, L. M. Banta, and S. D. Emr, 1997 Endosomal transport function in yeast requires a novel AAA-type ATPase, Vps4p. *The EMBO Journal* 16: 1820–1831.
- Botstein, D., and G. R. Fink, 2011 *Yeast: An Experimental Organism for 21st Century Biology*. *Genetics* 189: 695–704.
- Carter, Z., and D. Delneri, 2010 New generation of loxP-mutated deletion cassettes for the genetic manipulation of yeast natural isolates. *Yeast* 27: 765–775.
- Chee, M. K., and S. B. Haase, 2012 New and Redesigned pRS Plasmid Shuttle Vectors for Genetic Manipulation of *Saccharomyces cerevisiae*. *G3: Genes, Genomes, Genetics* 2: 515–526.
- Christianson, T. W., R. S. Sikorski, M. Dante, J. H. Shero, and P. Hieter, 1992 Multifunctional yeast high-copy-number shuttle vectors. *Gene* 110: 119–122.
- Da Silva, N. A., and S. Srikrishnan, 2012 Introduction and expression of genes for metabolic engineering applications in *Saccharomyces cerevisiae*. *FEMS Yeast Res* 12: 197–214.
- Fang, F., K. Salmon, M. W. Y. Shen, K. A. Aeling, E. Ito *et al.*, 2011 A vector set for systematic metabolic engineering in *Saccharomyces cerevisiae*. *Yeast* 28: 123–136.
- Futcher, B., and J. Carbon, 1986 Toxic effects of excess cloned centromeres. *Molecular and Cellular Biology* 6: 2213–2222.
- Gibson, D. G., 2009 Synthesis of DNA fragments in yeast by one-step assembly of overlapping oligonucleotides. *Nucleic Acids Res* 37: 6984–6990.



- Gibson, D. G., L. Young, R.-Y. Chuang, J. C. Venter, C. A. Hutchison III *et al.*, 2009 Enzymatic assembly of DNA molecules up to several hundred kilobases. *Nature Methods* 6: 343–345.
- Gietz, D., A. S. Jean, R. A. Woods, and R. H. Schiestl, 1992 Improved method for high efficiency transformation of intact yeast cells. *Nucleic Acids Res* 20: 1425–1425.
- Gueldener, U., J. Heinisch, G. J. Koehler, D. Voss, and J. H. Hegemann, 2002 A second set of loxP marker cassettes for Cre-mediated multiple gene knockouts in budding yeast. *Nucleic Acids Res* 30: e23–e23.
- Guthrie, C., and G. R. Fink, 2002 *Guide to yeast genetics and molecular biology*. Academic Press, San Diego, CA.
- Jensen, N. B., T. Strucko, K. R. Kildegaard, F. David, J. Maury *et al.*, 2014 EasyClone: method for iterative chromosomal integration of multiple genes *Saccharomyces cerevisiae*. *FEMS Yeast Res* 14: 238–248.
- Lee, M. E., W. C. DeLoache, B. Cervantes, and J. E. Dueber, 2015 A Highly Characterized Yeast Toolkit for Modular, Multipart Assembly. *ACS Synth. Biol.* 4: 975–986.
- Lobingier, B. T., D. P. Nickerson, S.-Y. Lo, and A. J. Merz, 2014 SM proteins Sly1 and Vps33 co-assemble with Sec17 and SNARE complexes to oppose SNARE disassembly by Sec18 (R. Jahn, Ed.). *eLife* 3: e02272.
- Mead, D. J., D. C. J. Gardner, and S. G. Oliver, 1986 The yeast 2  $\mu$  plasmid: strategies for the survival of a selfish DNA. *Mol Gen Genet* 205: 417–421.
- Nickerson, D. P., and A. J. Merz, 2015 LUCID: A Quantitative Assay of ESCRT-Mediated Cargo Sorting into Multivesicular Bodies. *Traffic* 16: 1318–1329.

Nickerson, D. P., M. R. G. Russell, S.-Y. Lo, H. C. Chapin, J. M. Milnes *et al.*, 2012 Termination of Isoform-Selective Vps21/Rab5 Signaling at Endolysosomal Organelles by Msb3/Gyp3.

Traffic 13: 1411–1428.

Odorizzi, G., M. Babst, and S. D. Emr, 1998 Fab1p PtdIns(3)P 5-Kinase Function Essential for Protein Sorting in the Multivesicular Body. *Cell* 95: 847–858.

Paulsel, A. L., A. J. Merz, and D. P. Nickerson, 2013 Vps9 family protein Muk1 is the second Rab5 guanosine nucleotide exchange factor in budding yeast. *J. Biol. Chem.* jbc.M113.457069.

Resnick, M. A., J. Westmoreland, and K. Bloom, 1990 Heterogeneity and maintenance of centromere plasmid copy number in *Saccharomyces cerevisiae*. *Chromosoma* 99: 281–288.

Robinson, J. S., D. J. Klionsky, L. M. Banta, and S. D. Emr, 1988 Protein sorting in *Saccharomyces cerevisiae*: isolation of mutants defective in the delivery and processing of multiple vacuolar hydrolases. *Molecular and Cellular Biology* 8: 4936–4948.

Rose, M. D., F. Winston, and P. Hieter, 1990 *Methods in Yeast Genetics: A Laboratory Course Manual*. Cold Spring Harbor Laboratory Press, Cold Spring Harbor, NY.

Schwartz, M. L., D. P. Nickerson, B. T. Lobingier, R. L. Plemel, M. Duan *et al.*, 2017 Sec17 ( $\alpha$ -SNAP) and an SM-tethering complex regulate the outcome of SNARE zippering in vitro and in vivo (A. T. Brunger, Ed.). *eLife* 6: e27396.

Seifert, H. S., E. Y. Chen, M. So, and F. Heffron, 1986 Shuttle mutagenesis: a method of transposon mutagenesis for *Saccharomyces cerevisiae*. *PNAS* 83: 735–739.

- Sherman, F., 2002 Getting started with yeast, pp. 3–41 in *Methods in Enzymology*, edited by C. Guthrie and G. R. Fink. Guide to Yeast Genetics and Molecular and Cell Biology - Part B, Academic Press.
- Shideler, T., D. P. Nickerson, A. J. Merz, and G. Odorizzi, 2015 Ubiquitin binding by the CUE domain promotes endosomal localization of the Rab5 GEF Vps9. *MBoC* 26: 1345–1356.
- Siddiqui, M. S., A. Choksi, and C. D. Smolke, 2014 A system for multilocus chromosomal integration and transformation-free selection marker rescue. *FEMS Yeast Research* 14: 1171–1185.
- Sikorski, R. S., and P. Hieter, 1989 A system of shuttle vectors and yeast host strains designed for efficient manipulation of DNA in *Saccharomyces cerevisiae*. *Genetics* 122: 19–27.
- Vida, T. A., and S. D. Emr, 1995 A new vital stain for visualizing vacuolar membrane dynamics and endocytosis in yeast. *J Cell Biol* 128: 779–792.
